# Supplementary material for: OutKnocker: a web tool for rapid and simple genotyping of designer nuclease edited cell lines
Source: PubMed Central journal article supplement — Genome Res. 2014 Oct;24(10):1719–23. doi: 10.1101/gr.176701.114 (PMC4199374; doi:10.1101/gr.176701.114), 2014-10
Supplement: supp_gr.176701.114_Supplemental_Figure_2.pdf [file supp_gr.176701.114_Supplemental_Figure_2.pdf]

Select pie chart to obtain alignment view at the lower part of the screen.

Press "RESTART" to return to input screen.

RESTART

The size of each pie chart indicates the number of reads that are taken into account.

The color of the individual pie areas indicate in-frame and out-of-frame indel events.

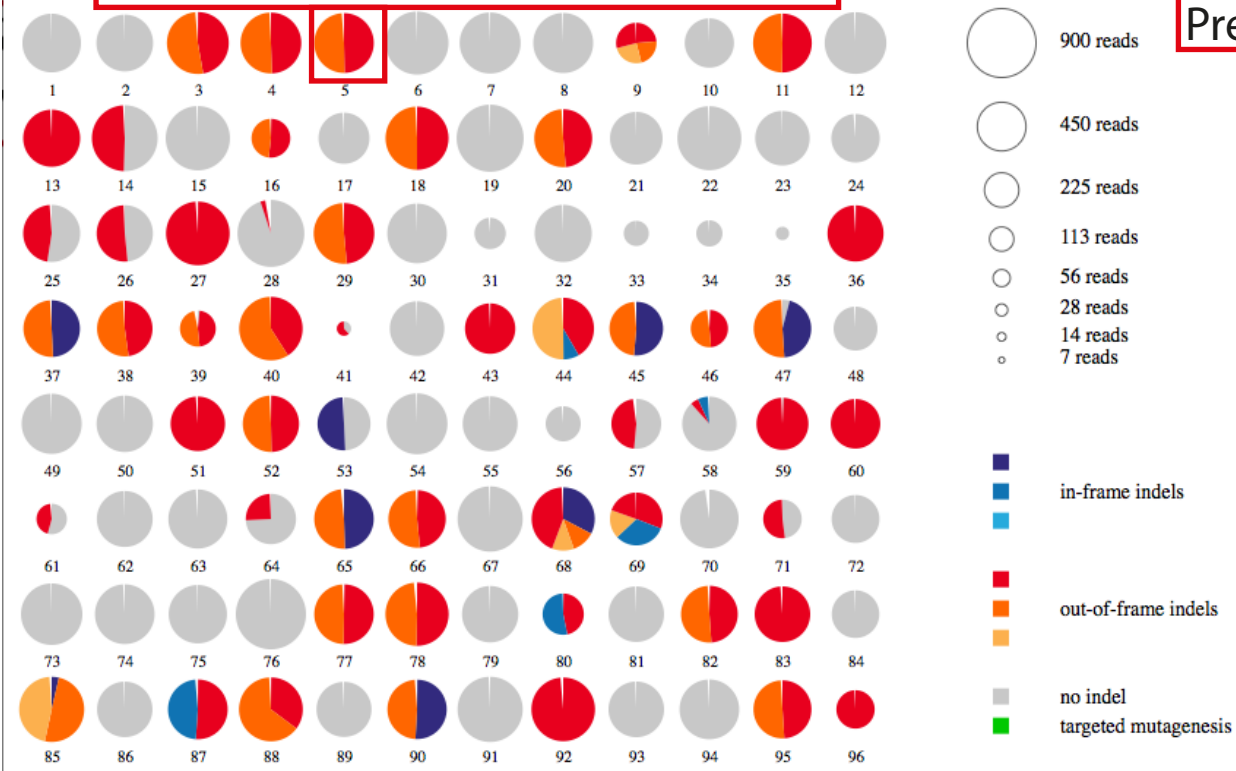

BARCODE #5 (677 reads)

REFERENCE CAGATGCTCTAAAATTACCAACTCCATTAAGGGTACAGTCATCAAACCTCTAATTCTAACAATCCAGAAATCTGATTCAA

CALL #1 CAGATGCTCTAAAATTACC-----TTAATTCTAACAATCCAGAAATCTGATTCAA 50% (338 reads)  
29nt deletion

CALL #2 CAGATGCTCTAAAATTACCAACTC----AAGGGTACAGTCATCAAACCTCTAATTCTAACAATCCAGAAATCTGATTCAA 49% (334 reads)  
4nt deletion

BELOW CALLING THRESHOLD 0% (3 reads)

FAILED ALIGNMENT 0% (2 reads)

Phred score dropouts: 25 reads

An alignment view of individual indel events identified is depicted. The sequencing reads are aligned to the reference sequence.
