# Supplementary material for: OutKnocker: a web tool for rapid and simple genotyping of designer nuclease edited cell lines
Source: PubMed Central journal article supplement — Genome Res. 2014 Oct;24(10):1719–23. doi: 10.1101/gr.176701.114 (PMC4199374; doi:10.1101/gr.176701.114), 2014-10

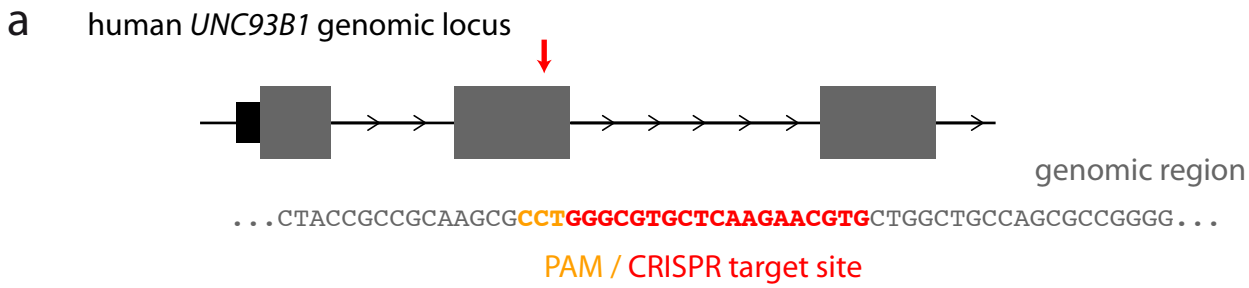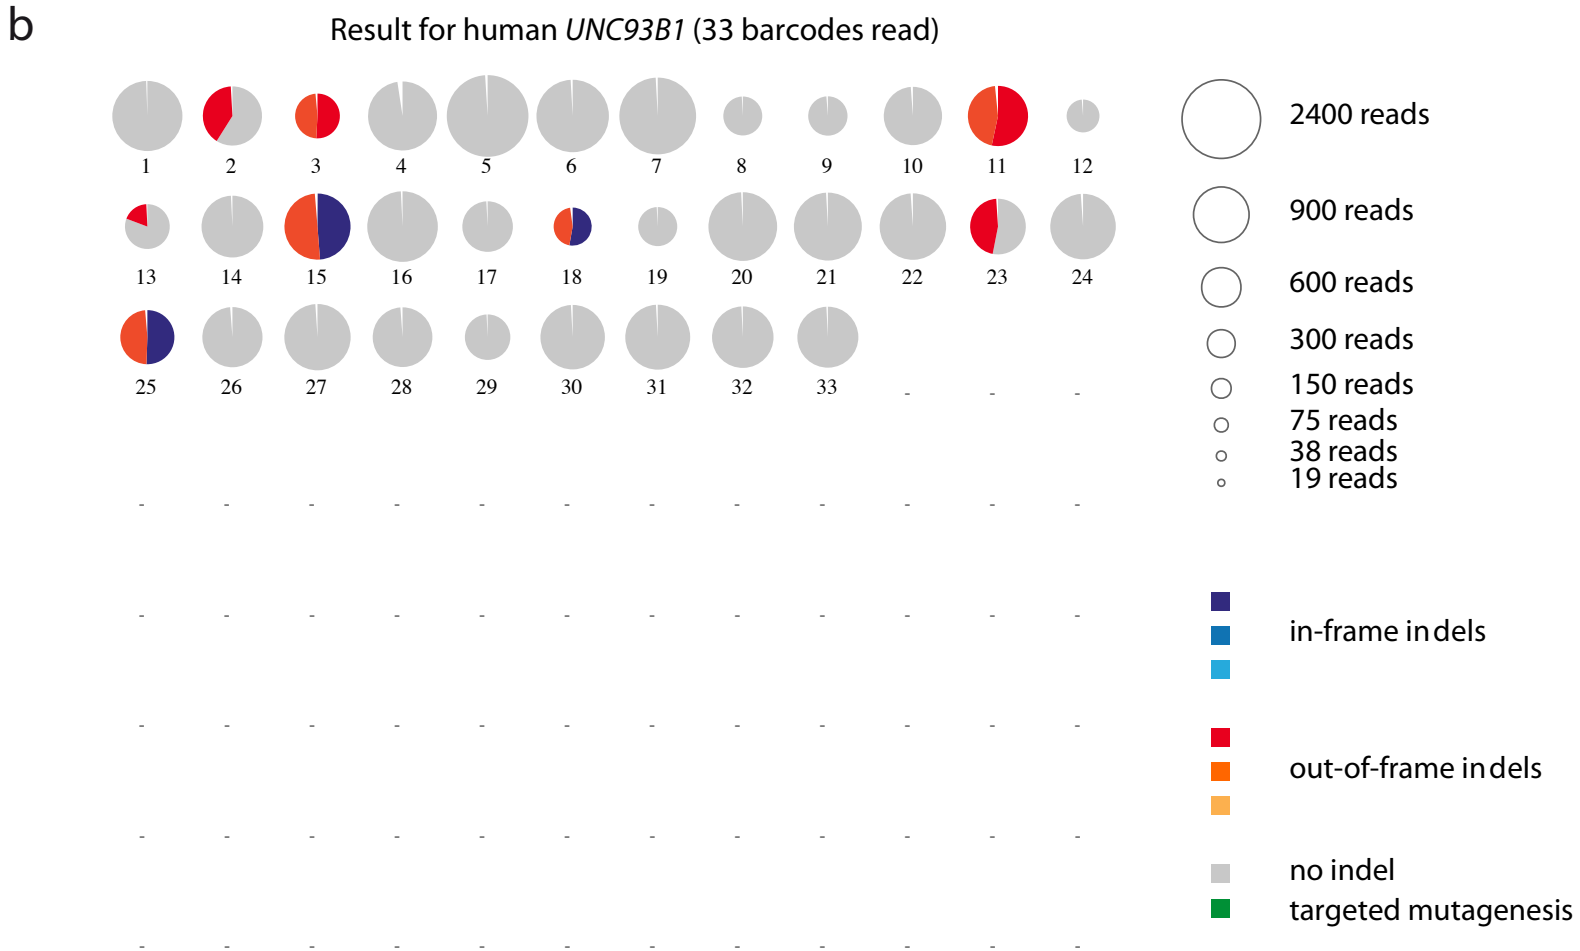

**c**

clone 11

```

TACTACCGCCGCAAGCGCCTGGGCGTGCTCAAGAACGTGCTGGCTGCCAGCGCCGGGGGCATGCTCACCTACG REF
TACTACCGCCGCAAGCGCCTGGG--GTGCTCAAGAACGTGCTGGCTGCCAGCGCCGGGGGCATGCTCACCTACG -1nt
TACTACCGCCGCAAGCGCCTGGG--TGCTCAAGAACGTGCTGGCTGCCAGCGCCGGGGGCATGCTCACCTACG -2nt

```

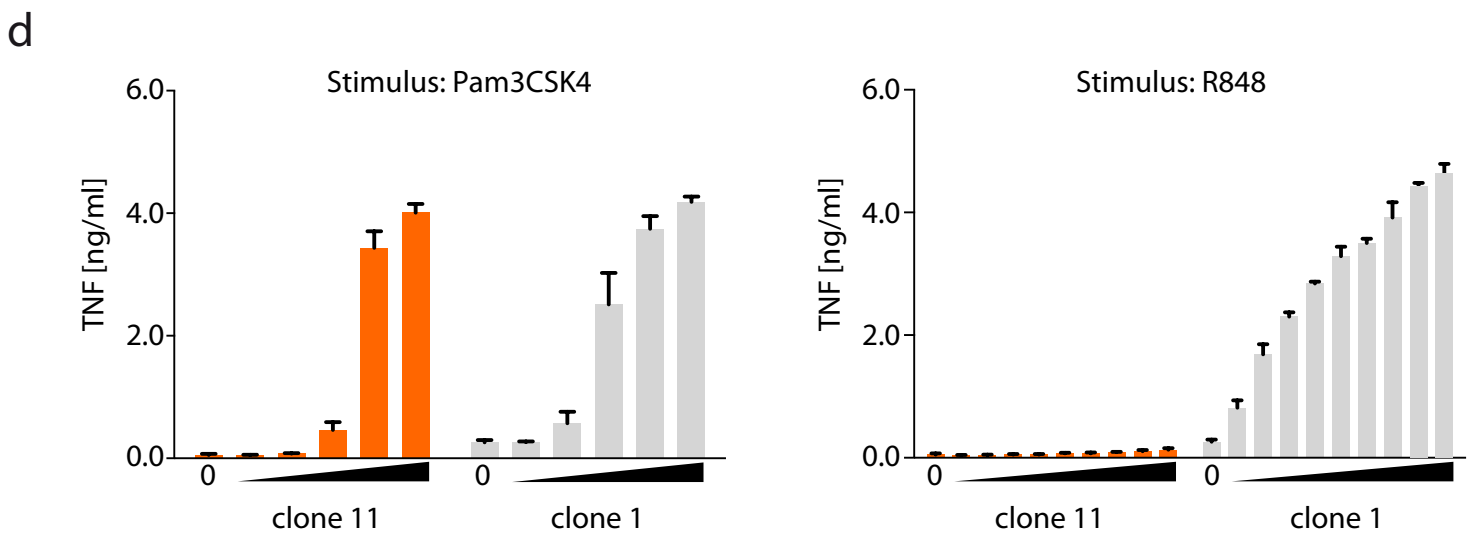

Supplement: supp_gr.176701.114_Supplemental_Figure_3.pdf [file supp_gr.176701.114_Supplemental_Figure_3.pdf]
