# Supplementary material for: OutKnocker: a web tool for rapid and simple genotyping of designer nuclease edited cell lines
Source: PubMed Central journal article supplement — Genome Res. 2014 Oct;24(10):1719–23. doi: 10.1101/gr.176701.114 (PMC4199374; doi:10.1101/gr.176701.114), 2014-10
Supplement: supp_gr.176701.114_Supplemental_Table_1.pdf [file supp_gr.176701.114_Supplemental_Table_1.pdf]

## SUPPLEMENTARY TABLE 1 | Primer sequences

### Primers for amplifying edited loci (first PCR):

|             |                                                          |
|-------------|----------------------------------------------------------|
| TLR2 fwd    | ACACTCTTTCCCTACACGACGCTCTTCCGATCTAGCCTCCGGATTGTTAACGTTTC |
| TLR2 rev    | TGACTGGAGTTCAGACGTGTGCTCTTCCGATCTTCAGAACTATCCACTGGTGAAAC |
| UNC93B1 fwd | ACACTCTTTCCCTACACGACGCTCTTCCGATCTGCTCGCAGCTGGACGAGCTGGTG |
| UNC93B1 fwd | TGACTGGAGTTCAGACGTGTGCTCTTCCGATCTAGGGCAGCGGAGGGGAAGTGAGA |

### Illumina barcoding primers (second PCR):

|             |                                                                  |
|-------------|------------------------------------------------------------------|
| I11u fwd 1  | AATGATACGGCGACCACCGAGATCTACACTATAGCCTACACTCTTTCCCTACACGACGCT     |
| I11u fwd 2  | AATGATACGGCGACCACCGAGATCTACACATAGAGGCACACTCTTTCCCTACACGACGCT     |
| I11u fwd 3  | AATGATACGGCGACCACCGAGATCTACACCCTATCCTACACTCTTTCCCTACACGACGCT     |
| I11u fwd 4  | AATGATACGGCGACCACCGAGATCTACACGGCTCTGAACACTCTTTCCCTACACGACGCT     |
| I11u fwd 5  | AATGATACGGCGACCACCGAGATCTACACAGGCGAAGACACTCTTTCCCTACACGACGCT     |
| I11u fwd 6  | AATGATACGGCGACCACCGAGATCTACACTAATCTTAACACTCTTTCCCTACACGACGCT     |
| I11u fwd 7  | AATGATACGGCGACCACCGAGATCTACACCAGGACGTACACTCTTTCCCTACACGACGCT     |
| I11u fwd 8  | AATGATACGGCGACCACCGAGATCTACACGTAAGTACTGACACACTCTTTCCCTACACGACGCT |
| I11u rev 1  | CAAGCAGAAGACGGCATAACGAGATCGAGTAATGTGACTGGAGTTCAGACGTGTGCT        |
| I11u rev 2  | CAAGCAGAAGACGGCATAACGAGATTCTCCGGAGTGACTGGAGTTCAGACGTGTGCT        |
| I11u rev 3  | CAAGCAGAAGACGGCATAACGAGATAATGAGCGGTGACTGGAGTTCAGACGTGTGCT        |
| I11u rev 4  | CAAGCAGAAGACGGCATAACGAGATGGAATCTCGTGACTGGAGTTCAGACGTGTGCT        |
| I11u rev 5  | CAAGCAGAAGACGGCATAACGAGATTTCTGAATGTGACTGGAGTTCAGACGTGTGCT        |
| I11u rev 6  | CAAGCAGAAGACGGCATAACGAGATACGAATTCGTGACTGGAGTTCAGACGTGTGCT        |
| I11u rev 7  | CAAGCAGAAGACGGCATAACGAGATAGCTTCAGGTGACTGGAGTTCAGACGTGTGCT        |
| I11u rev 8  | CAAGCAGAAGACGGCATAACGAGATGCGCATTAGTGACTGGAGTTCAGACGTGTGCT        |
| I11u rev 9  | CAAGCAGAAGACGGCATAACGAGATCATAGCCGGTGACTGGAGTTCAGACGTGTGCT        |
| I11u rev 10 | CAAGCAGAAGACGGCATAACGAGATTTTCGCGGAGTGACTGGAGTTCAGACGTGTGCT       |
| I11u rev 11 | CAAGCAGAAGACGGCATAACGAGATGCGCGAGAGTGACTGGAGTTCAGACGTGTGCT        |
| I11u rev 12 | CAAGCAGAAGACGGCATAACGAGATCTATCGCTGTGACTGGAGTTCAGACGTGTGCT        |
